# Supplementary material for: The CMCC Decadal Prediction System
Source: Copernicus journal article supplement (doi:10.5194/gmd-2022-181), 2022-07-21
Supplement: Supplementary file 1 [file gmd-2022-181-supplement.pdf]

# **The CMCC Decadal Prediction System**

Dario Nicoli<sup>1</sup>, Alessio Bellucci<sup>1,a</sup>, Paolo Ruggieri<sup>1,b</sup>, Panos Athanasiadis<sup>1</sup>, Stefano Materia<sup>1</sup>, Daniele Peano<sup>1</sup>, Giusy Fedele<sup>1</sup> and Silvio Gualdi<sup>1</sup>

<sup>1</sup>Fondazione Centro Euro-Mediterraneo sui Cambiamenti Climatici, Bologna, 40127, Italy

<sup>a</sup>now at: Consiglio Nazionale delle Ricerche, Istituto di Scienze dell'Atmosfera e del Clima (CNR-ISAC), Bologna, 40129, Italy

<sup>b</sup>now at: Department of Physics and Astronomy, University of Bologna, Bologna, 40126, Italy.

*Correspondence to:* Dario Nicoli (dario.nicoli@cmcc.it)

**- SUPPLEMENTARY MATERIAL -**

## Supplementary Figures:

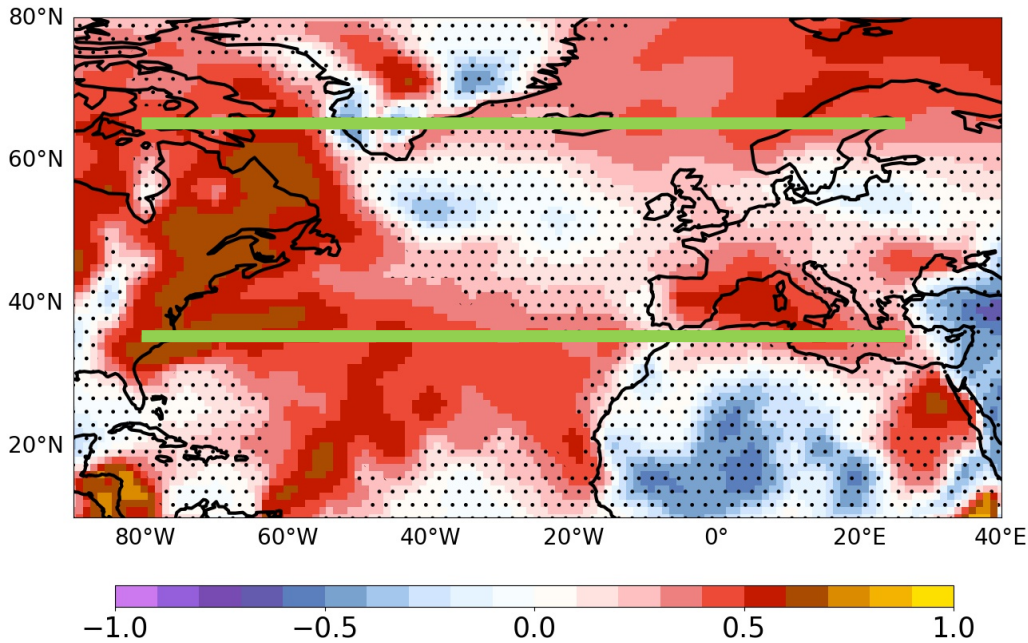

**Fig S1:** MSLP ACC for lead years 1-9. Stippling denotes points where 95% statistical significance is not reached, according to a one-tailed t test. The actual number of degrees of freedom has been computed following Bretherton et al., 1999. Green lines represent the longitudinal domain considered for the NAO index computation.

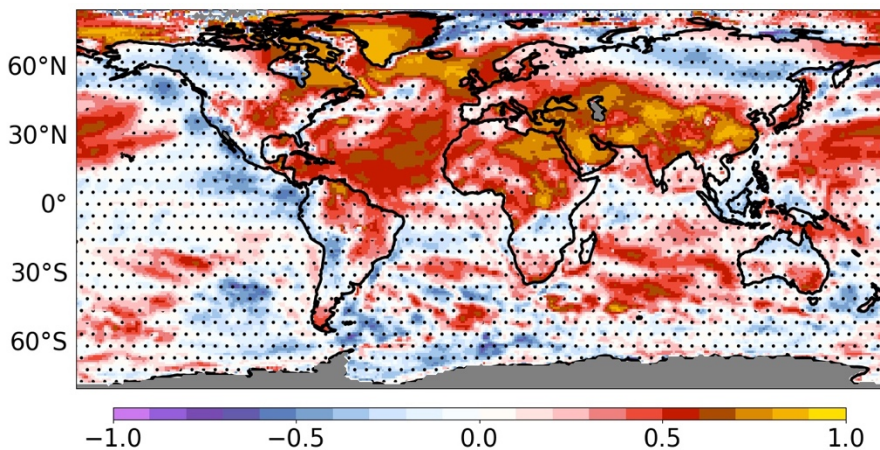

**Fig S2:** Detrended near-surface temperature ACC for lead year 4-10. Stippling denotes points where 95% statistical significance is not reached, according to a one-tailed t test. The actual number of degrees of freedom has been computed following Bretherton et al., 1999.
